# Supplementary material for: Hybrid protein assembly-histone modification mechanism for PRC2-based epigenetic switching and memory
Source: eLife. 2021 Sep 2;10:e66454. doi: 10.7554/eLife.66454 (PMC8412945; doi:10.7554/eLife.66454)
Supplement: Figure 1—source data 1. [file elife-66454-fig1-data1.xlsx]

## Sheet: Sheet1
Figure 1 - source data 1. MN-ChIP raw data. The values depict % recovery input and Standard Error (SE). Bio rep # corresponds to replicate number and labels in A column to the position of FLC amplicon.
% recovery input	bio rep 1	bio rep 2	bio rep 3	bio rep 1	bio rep 2	bio rep 3	SE
	H3	H3	H3	H3K27me3	H3K27me3	H3K27me3		H3	K27
.-86	0.276171	0.25092	0.153215	0.127948	0.503582	0.284592	.-86	0.0306122	0.0889433
.-49	0.368644	0.199385	0.178868	0.327666	0.20594	0.722114	.-49	0.0490971	0.127198
67	2.81597	2.73897	1.62109	8.05731	5.88469	7.92805	67	0.315249	0.574532
98	1.49862	1.10468	0.812421	2.58524	2.27148	3.46687	98	0.162329	0.292161
117	3.81134	6.05013	3.34491	11.474	12.9089	13.8995	117	0.681718	0.57489
348	0.0228811	0.0155922	0.0685658	0.0669997	0.0201041	0.116115	348	0.0135352	0.0226321
415	0.808675	0.978492	0.618551	1.55326	1.42764	2.7644	415	0.0848838	0.347987
581	0.981889	0.86073	0.624295	1.62109	2.45144	2.12427	581	0.0857333	0.197176
651	0.931073	0.744133	0.673756	1.50904	1.4814	2.36794	651	0.06269	0.237613
785	0.228505	0.169611	0.508258	0.32691	0.447605	0.83913	785	0.0852908	0.126231
923	0.0451321	0.090056	0.090056	0.263091	0.113726	0.49208	923	0.0122267	0.0898349
STM	2.02366	2.24021	1.56587	6.163	5.21849	6.09221	STM	0.162297	0.247991
