# Supplementary material for: Hybrid protein assembly-histone modification mechanism for PRC2-based epigenetic switching and memory
Source: eLife. 2021 Sep 2;10:e66454. doi: 10.7554/eLife.66454 (PMC8412945; doi:10.7554/eLife.66454)
Supplement: Figure 1—source data 2. [file elife-66454-fig1-data2.xlsx]

## Sheet: Sheet1
Figure 1 - source data 2. Fraction of FLC-ON cells used in Figure 1C, 2D and Figure 1 - supplement 2.
Days after cold exposure	Fraction of FLC-ON cells
T7	0.0701651
T10	0.162034
T14	0.290785
